# Supplementary material for: Longitudinal CITE-Seq profiling of chronic lymphocytic leukemia during ibrutinib treatment: evolution of leukemic and immune cells at relapse
Source: PubMed Central journal article supplement (PMC7724843; doi:10.1186/s40364-020-00253-w), 2020-12-09
Supplement: 40364_2020_253_MOESM1_ESM.pdf [file 40364_2020_253_MOESM1_ESM.pdf]

**Longitudinal CITE-Seq profiling of Chronic Lymphocytic Leukemia during  
ibrutinib treatment: evolution of leukemic and immune cells at relapse.**

Cadot *et al*

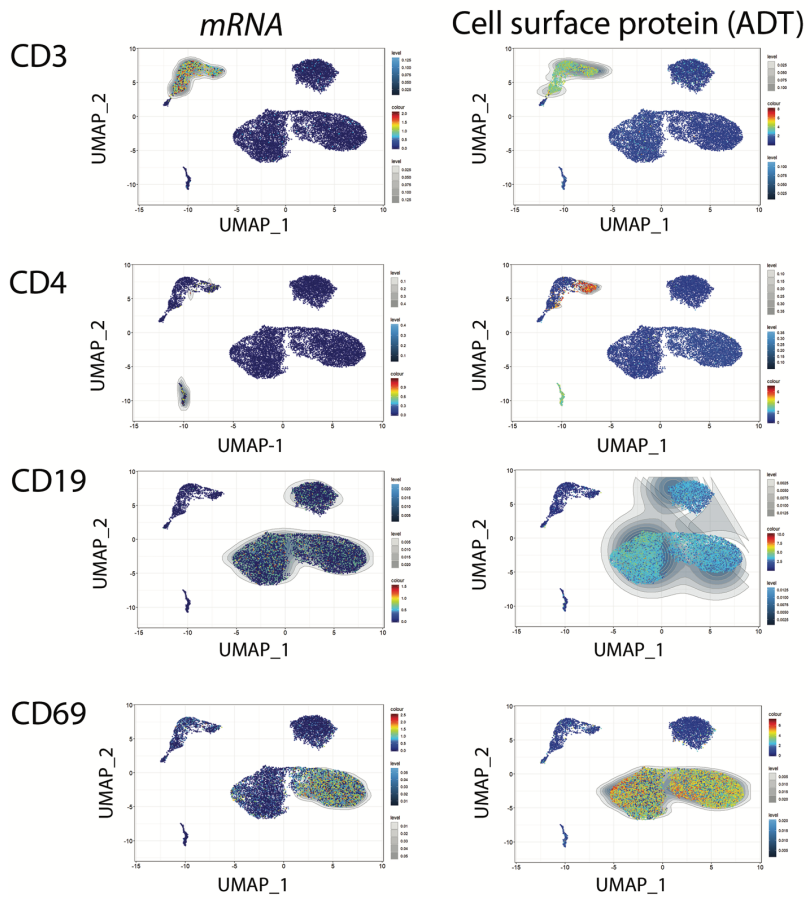

**Additional Fig. 1.** UMAP representation of integrated CITE-Seq data according to gene expression (mRNA) and cell surface protein (ADT-labeling).

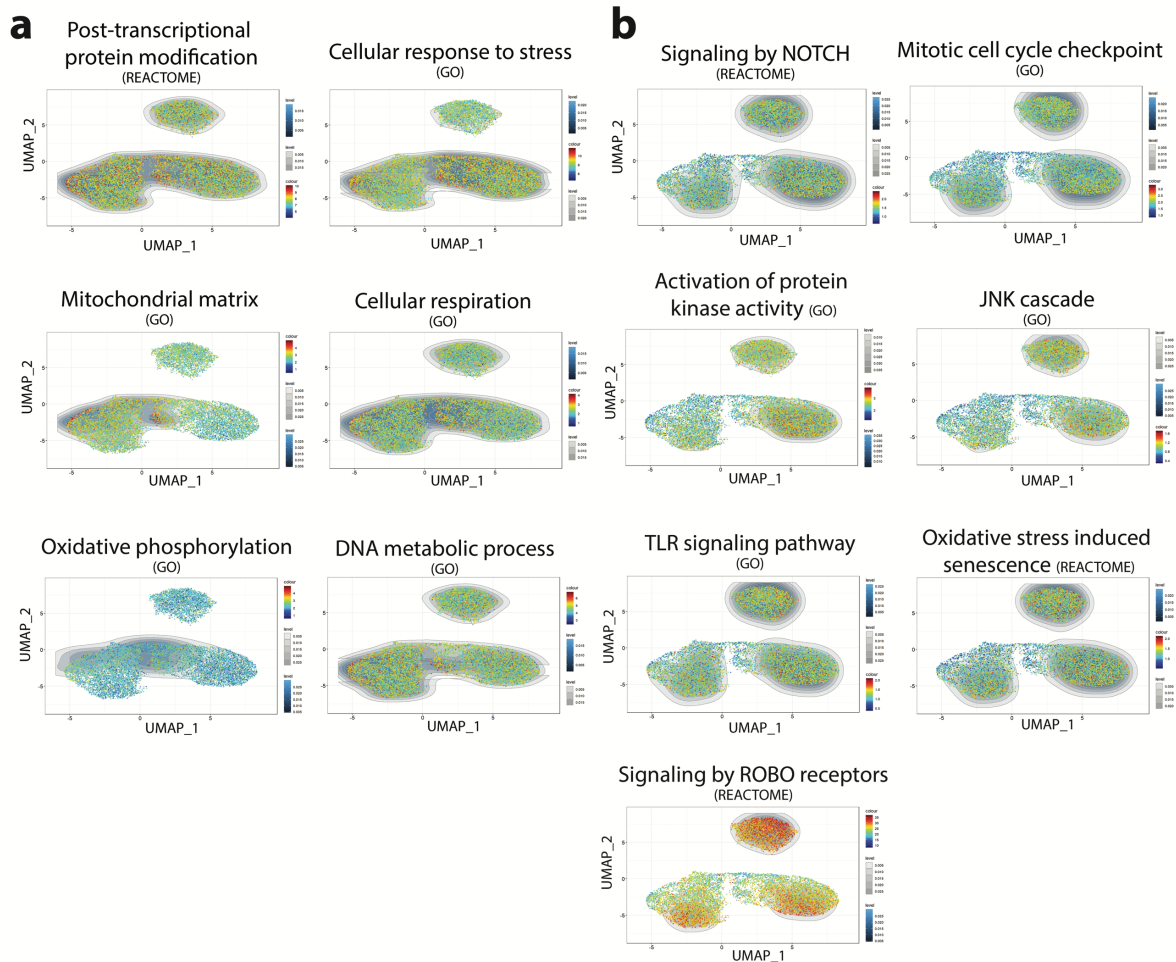

**Additional Fig. 2:** Ibrutinib regulated pathways in MC2 leukemic cells. **(a)** UMAP representation of differential up-regulated pathways between MC1 and MC2 cells; **(b)** UMAP representation of differential down-regulated pathways between MC1 and MC2 cells.

|                        | Clinical Features |
|------------------------|-------------------|
| Gender                 | M                 |
| Age                    | 60                |
| IGHV status            | UM                |
| Del17p                 | No                |
| Del11q                 | No                |
| Del13q                 | No                |
| Tri12                  | No                |
| <i>TP53</i> mutation   | No                |
| <i>SF3B1</i> mutation  | No                |
| <i>NOTCH1</i> mutation | No                |
| <i>Myd88</i> mutation  | No                |
| <i>BTK</i> mutation    | No                |
| <i>PLCγ2</i> mutation  | No                |
| Complex karyotype      | Yes               |
| Bulky lymph node       | No                |
| Previous treatments    | >2                |

**Additional Table 1.** Clinical features before treatment

| Up-regulated genes at relapse |
|-------------------------------|
| <i>BCL2</i>                   |
| <i>BCL2L11</i>                |
| <i>CCL4</i>                   |
| <i>CD69</i>                   |
| <b><i>CD70</i></b>            |
| <i>CNOT1</i>                  |
| <b><i>CTLA4</i></b>           |
| <i>CXCR4</i>                  |
| <i>DDIT4</i>                  |
| <i>DUSP1</i>                  |
| <b><i>DUSP10</i></b>          |
| <b><i>DUSP4</i></b>           |
| <b><i>DUSP5</i></b>           |
| <b><i>FOSB</i></b>            |
| <i>JUN</i>                    |
| <i>JUND</i>                   |
| <b><i>KIF9</i></b>            |
| <b><i>KLF10</i></b>           |
| <i>KLF6</i>                   |
| <b><i>KLHL15</i></b>          |
| <i>NFKB1A</i>                 |
| <i>PMAIP1</i>                 |
| <i>RGS1</i>                   |
| <b><i>RGS16</i></b>           |
| <i>RGS2</i>                   |
| <b><i>RHOB</i></b>            |
| <b><i>STAT4</i></b>           |
| <b><i>TOX2</i></b>            |
| <b><i>TP53INP2</i></b>        |
| <i>USP12</i>                  |

**Additional Table 2.** Ibrutinib up-regulated genes at relapse

Up-regulated genes at relapse (compared to M0, pBH < 0.001, fold change > 4)

Genes in bold represented those up-regulated only in B leukemic cells (compared to Additional Table1)

| <b>T cytotoxic signature</b> | <b>T activation signature</b> | <b>T exhaustion signature</b> | <b>BCR Activation<sup>34</sup></b> |                | <b>CXCR4 Signaling<sup>33</sup></b> |               |               | <b>Lymph Node signature<sup>34</sup></b> | <b>NF-kB signature pathway<sup>34</sup></b> |
|------------------------------|-------------------------------|-------------------------------|------------------------------------|----------------|-------------------------------------|---------------|---------------|------------------------------------------|---------------------------------------------|
| <i>FCGR3A</i>                | <i>CADM1</i>                  | <i>BTLA</i>                   | <i>AARS</i>                        | <i>NAB2</i>    | <i>ADRBK1</i>                       | <i>ITGA11</i> | <i>PXN</i>    | <i>AICDA</i>                             | <i>BCL2A1</i>                               |
| <i>FGBP2</i>                 | <i>CD1D</i>                   | <i>CD160</i>                  | <i>ADM2</i>                        | <i>NAMPT</i>   | <i>AKT1</i>                         | <i>ITGA2</i>  | <i>RAC1</i>   | <i>AURKA</i>                             | <i>CCL3</i>                                 |
| <i>GNLY</i>                  | <i>CD2</i>                    | <i>CD244</i>                  | <i>AKAP1</i>                       | <i>NFKB1</i>   | <i>ARR3</i>                         | <i>ITGA3</i>  | <i>RALB</i>   | <i>AURKB</i>                             | <i>CCL4</i>                                 |
| <i>GZMA</i>                  | <i>CD24</i>                   | <i>CTLA4</i>                  | <i>ARID5B</i>                      | <i>NFKBIE</i>  | <i>ARRB2</i>                        | <i>ITGA4</i>  | <i>RAP1B</i>  | <i>BIRC5</i>                             | <i>CCND2</i>                                |
| <i>GZMB</i>                  | <i>CD276</i>                  | <i>HAVCR2</i>                 | <i>BACH2</i>                       | <i>NHP2</i>    | <i>BAD</i>                          | <i>ITGA5</i>  | <i>RGS1</i>   | <i>BUB1B</i>                             | <i>CD83</i>                                 |
| <i>GZMH</i>                  | <i>CD28</i>                   | <i>LAG3</i>                   | <i>BCL2</i>                        | <i>NME1</i>    | <i>BCAR1</i>                        | <i>ITGA6</i>  | <i>RHOA</i>   | <i>CCL3</i>                              | <i>CXCL10</i>                               |
| <i>GZMK</i>                  | <i>CD3D</i>                   | <i>PDCD1</i>                  | <i>CASP3</i>                       | <i>NR4A3</i>   | <i>BLK</i>                          | <i>ITGA7</i>  | <i>RHOB</i>   | <i>CCL4</i>                              | <i>DUSP2</i>                                |
| <i>PRF1</i>                  | <i>CD3E</i>                   | <i>TIGIT</i>                  | <i>CCL4</i>                        | <i>OAS1</i>    | <i>CD247</i>                        | <i>ITGA8</i>  | <i>RHOC</i>   | <i>CCNA2</i>                             | <i>EBI3</i>                                 |
|                              | <i>CD4</i>                    | <i>VSIR</i>                   | <i>CD58</i>                        | <i>OAS3</i>    | <i>CD3D</i>                         | <i>ITGA9</i>  | <i>RICTOR</i> | <i>CCNB1</i>                             | <i>GADD45B</i>                              |
|                              | <i>CD47</i>                   |                               | <i>CD63</i>                        | <i>PAICS</i>   | <i>CD3E</i>                         | <i>ITGAV</i>  | <i>SRC</i>    | <i>CCNB2</i>                             | <i>HEATR1</i>                               |
|                              | <i>CD7</i>                    |                               | <i>CD72</i>                        | <i>PEA15</i>   | <i>CD3G</i>                         | <i>ITGB1</i>  | <i>SSH1</i>   | <i>CCND2</i>                             | <i>ID2</i>                                  |
|                              | <i>CLEC7A</i>                 |                               | <i>CD83</i>                        | <i>PIM3</i>    | <i>CD4</i>                          | <i>JAK2</i>   | <i>STAT1</i>  | <i>CCNL1</i>                             | <i>JUNB</i>                                 |
|                              | <i>CRTAM</i>                  |                               | <i>CIITA</i>                       | <i>RGS10</i>   | <i>CDC42</i>                        | <i>LCK</i>    | <i>STAT2</i>  | <i>CD69</i>                              | <i>LTA</i>                                  |
|                              | <i>EBI3</i>                   |                               | <i>CLEC2D</i>                      | <i>SLAMF7</i>  | <i>CFL1</i>                         | <i>LIMK1</i>  | <i>STAT3</i>  | <i>CD83</i>                              | <i>NFKBIE</i>                               |
|                              | <i>ELF4</i>                   |                               | <i>CTLA4</i>                       | <i>SOCS5</i>   | <i>CRK</i>                          | <i>LYN</i>    | <i>STAT5A</i> | <i>CDC6</i>                              | <i>PBEF1</i>                                |
|                              | <i>FOXP3</i>                  |                               | <i>DDIT3</i>                       | <i>SPAG9</i>   | <i>CSK</i>                          | <i>MAPKA</i>  | <i>STAT5B</i> | <i>CDT1</i>                              | <i>RGS1</i>                                 |
|                              | <i>GLMN</i>                   |                               | <i>DDX21</i>                       | <i>TLK1</i>    | <i>CXCL12</i>                       | <i>P1</i>     | <i>UBQLN1</i> | <i>CENPE</i>                             | <i>TNF</i>                                  |
|                              | <i>ICOSLG</i>                 |                               | <i>DTX1</i>                        | <i>TNFAIP3</i> | <i>CXCR4</i>                        | <i>MLST8</i>  | <i>VAV1</i>   | <i>CHEK1</i>                             |                                             |
|                              | <i>IL12B</i>                  |                               | <i>DUSP2</i>                       | <i>TXNRD1</i>  | <i>DNMI</i>                         | <i>MMP9</i>   | <i>VPS4A</i>  | <i>CR2</i>                               |                                             |
|                              | <i>IL18</i>                   |                               | <i>EGR1</i>                        | <i>WARS</i>    | <i>FGR</i>                          | <i>MTOR</i>   | <i>VPS4B</i>  | <i>CTLA4</i>                             |                                             |
|                              | <i>IL2</i>                    |                               | <i>EGR3</i>                        |                | <i>FOXO1</i>                        | <i>PAG1</i>   | <i>YES1</i>   | <i>DUSP1</i>                             |                                             |
|                              | <i>IL21</i>                   |                               | <i>GARS</i>                        |                | <i>FYN</i>                          | <i>PAK1</i>   |               | <i>DUSP2</i>                             |                                             |
|                              | <i>IL27</i>                   |                               | <i>GF11</i>                        |                | <i>GNA13</i>                        | <i>PDPK1</i>  |               | <i>EGR1</i>                              |                                             |
|                              | <i>IL4</i>                    |                               | <i>GNPDA1</i>                      |                | <i>GNA11</i>                        | <i>PIK3CA</i> |               | <i>EGR2</i>                              |                                             |
|                              | <i>IL7</i>                    |                               | <i>GPX4</i>                        |                | <i>GNAI2</i>                        | <i>PIK3CB</i> |               | <i>EGR3</i>                              |                                             |
|                              | <i>INS</i>                    |                               | <i>HLA-DQA1</i>                    |                | <i>GNAI3</i>                        | <i>PIK3CD</i> |               | <i>FOS</i>                               |                                             |
|                              | <i>JAG2</i>                   |                               | <i>HLA-DQB1</i>                    |                | <i>GNAO1</i>                        | <i>PIK3CG</i> |               | <i>JUN</i>                               |                                             |
|                              | <i>LAT</i>                    |                               | <i>IARS</i>                        |                | <i>GNAO1</i>                        | <i>PIK3R1</i> |               | <i>JUNB</i>                              |                                             |
|                              | <i>LAX1</i>                   |                               | <i>IFI30</i>                       |                | <i>GNAZ</i>                         | <i>PIK3R2</i> |               | <i>MCM4</i>                              |                                             |
|                              | <i>LCK</i>                    |                               | <i>IRF4</i>                        |                | <i>GNB1</i>                         | <i>PIK3R3</i> |               | <i>MCM6</i>                              |                                             |
|                              | <i>NCK1</i>                   |                               | <i>ITPKB</i>                       |                | <i>GNB2L1</i>                       | <i>PIK3R5</i> |               | <i>MK167</i>                             |                                             |
|                              | <i>NCK2</i>                   |                               | <i>KIAA01</i>                      |                | <i>GNG2</i>                         | <i>PIK3R6</i> |               | <i>MYC</i>                               |                                             |
|                              | <i>NHEJ1</i>                  |                               | <i>KLF10</i>                       |                | <i>GRK6</i>                         | <i>PLCB1</i>  |               | <i>NAMPT</i>                             |                                             |
|                              | <i>NLRC3</i>                  |                               | <i>LILRA4</i>                      |                | <i>HCK</i>                          | <i>PLCB2</i>  |               | <i>RGS1</i>                              |                                             |
|                              | <i>PTPRC</i>                  |                               | <i>LPL</i>                         |                | <i>HGS</i>                          | <i>PLCB3</i>  |               | <i>TK1</i>                               |                                             |
|                              | <i>SART1</i>                  |                               | <i>LRMP</i>                        |                | <i>HLA-DRA</i>                      | <i>PRKCZ</i>  |               | <i>TOP2A</i>                             |                                             |
|                              | <i>SFTPD</i>                  |                               | <i>LY9</i>                         |                | <i>HLA-DRB1</i>                     | <i>PTEN</i>   |               | <i>TTK</i>                               |                                             |
|                              | <i>SIRPG</i>                  |                               | <i>MX1</i>                         |                | <i>INPP5D</i>                       | <i>PTK2</i>   |               | <i>TYMS</i>                              |                                             |
|                              | <i>SIT1</i>                   |                               | <i>MYO1E</i>                       |                | <i>ITCH</i>                         | <i>PTK2B</i>  |               |                                          |                                             |
|                              | <i>SLA2</i>                   |                               |                                    |                | <i>ITGA1</i>                        | <i>PTPN11</i> |               |                                          |                                             |
|                              | <i>SOCS5</i>                  |                               |                                    |                | <i>ITGA10</i>                       | <i>PTPN6</i>  |               |                                          |                                             |
|                              | <i>SPINK5</i>                 |                               |                                    |                |                                     | <i>PTPRC</i>  |               |                                          |                                             |
|                              | <i>THY1</i>                   |                               |                                    |                |                                     |               |               |                                          |                                             |
|                              | <i>ZAP70</i>                  |                               |                                    |                |                                     |               |               |                                          |                                             |

**Additional Table 3.** Gene signatures.
